# Supplementary material for: Mechanochemical-Assisted Extraction and Hepatoprotective Activity Research of Flavonoids from Sea Buckthorn (Hippophaë rhamnoides L.) Pomaces
Source: MDPI journal article supplement (doi:10.3390/molecules26247615), 2021-12-15
Supplement: s1 [file s1]

## Supplementary Materials

# Mechanochemical-Assisted Extraction and Hepatoprotective Activity Research of Flavonoids from Sea Buckthorn (*Hippophaë rhamnoides* L.) Pomaces

Zili Guo, Jingya Cheng, Lei Zheng, Wenhao Xu \* and Yuanyuan Xie \*

Collaborative Innovation Center of Yangtze River Delta Region Green Pharmaceuticals, College of Pharmaceutical Sciences, Zhejiang University of Technology, Hangzhou, 31000, China;  
guozili@zjut.edu.cn (Z.G.); chengjy@zjut.edu.cn (J.C.); 18267735533@163.com (L.Z.)

\* Correspondence: xuwenhao@zjut.edu.cn (W.X.); xyycz@zjut.edu.cn (Y.X.);  
Tel.: +86-189-5805-7635 (W.X.) & (Y.X.)

**Table S1.** Box-Behnken experiment design with the independent variables.

| Run | $X_1$ | $X_2$ | $X_3$ | Yield of flavonoids (mg/g) |
|-----|-------|-------|-------|----------------------------|
| 1   | 500   | 10    | 30: 1 | 20.85                      |
| 2   | 500   | 20    | 40: 1 | 22.63                      |
| 3   | 400   | 30    | 20: 1 | 23.72                      |
| 4   | 400   | 20    | 30: 1 | 26.73                      |
| 5   | 500   | 30    | 30: 1 | 25.43                      |
| 6   | 400   | 30    | 40: 1 | 23.91                      |
| 7   | 400   | 10    | 20: 1 | 20.78                      |
| 8   | 400   | 20    | 30: 1 | 27.63                      |
| 9   | 400   | 10    | 40: 1 | 18.94                      |
| 10  | 300   | 30    | 30: 1 | 23.92                      |
| 11  | 400   | 20    | 30: 1 | 25.83                      |
| 12  | 300   | 10    | 30: 1 | 21.34                      |
| 13  | 300   | 20    | 20: 1 | 23.75                      |
| 14  | 400   | 20    | 30: 1 | 27.18                      |
| 15  | 500   | 20    | 20: 1 | 23.21                      |
| 16  | 300   | 20    | 40: 1 | 22.39                      |
| 17  | 400   | 20    | 30: 1 | 26.28                      |

**Table S2.** Regression model significance and analysis of variance.

| Source                        | df | Sum of squares | Mean square             | F-value | P-value   |
|-------------------------------|----|----------------|-------------------------|---------|-----------|
| Model                         | 9  | 96.52          | 10.72                   | 32.31   | <0.0001** |
| X <sub>1</sub>                | 1  | 0.065          | 0.065                   | 0.20    | 0.6719    |
| X <sub>2</sub>                | 1  | 28.39          | 28.39                   | 85.52   | <0.0001** |
| X <sub>3</sub>                | 1  | 1.61           | 1.61                    | 4.85    | 0.0634    |
| X <sub>1</sub> X <sub>2</sub> | 1  | 1.00           | 1.00                    | 3.01    | 0.1262    |
| X <sub>1</sub> X <sub>3</sub> | 1  | 0.15           | 0.15                    | 0.46    | 0.5202    |
| X <sub>2</sub> X <sub>3</sub> | 1  | 1.03           | 1.03                    | 3.10    | 0.1121    |
| X <sub>1</sub> <sup>2</sup>   | 1  | 7.60           | 7.60                    | 22.90   | 0.0020    |
| X <sub>2</sub> <sup>2</sup>   | 1  | 26.34          | 25.34                   | 79.36   | 0.0075**  |
| X <sub>3</sub> <sup>2</sup>   | 1  | 24.08          | 24.08                   | 72.53   | <0.0001** |
| Residual                      | 7  | 2.32           | 0.33                    |         | <0.0001** |
| Lack of Fit                   | 3  | 0.30           | 0.10                    | 0.20    |           |
| Pure Error                    | 4  | 2.02           | 0.51                    |         | 0.8937    |
| Cor Total                     | 16 | 98.84          | R <sup>2</sup> = 0.9765 |         |           |

*Note:* df, degree of freedom. \*  $p < 0.05$  significant. \*\*  $p < 0.01$  highly significant.

**Table S3.** Effect of NAFLD, curcumin, and sea buckthorn pomaces extracts on biochemical parameters in tetracycline liver cirrhosis mice.

| Animal group  | Serum       |             |             |              | AST           | ALT           | Liver       |             |             |             |
|---------------|-------------|-------------|-------------|--------------|---------------|---------------|-------------|-------------|-------------|-------------|
|               | TG          | TC          | HDL-C       | LDL-C        |               |               | TG          | TC          | HDL-C       | LDL-C       |
| NCG           | 1.76 ± 0.10 | 1.81 ± 0.11 | 0.82 ± 0.15 | 0.42 ± 0.08  | 59.91 ± 3.40  | 51.67 ± 2.30  | 0.28 ± 0.09 | 0.54 ± 0.10 | 2.13 ± 0.45 | 0.17 ± 0.08 |
| NMG           | 2.28 ± 0.10 | 3.62 ± 0.09 | 4.11 ± 0.31 | 10.18 ± 1.68 | 106.21 ± 6.22 | 128.17 ± 7.37 | 0.74 ± 0.15 | 1.17 ± 0.35 | 0.47 ± 0.28 | 0.22 ± 0.04 |
| MPG 200 mg/kg | 2.02 ± 0.11 | 2.70 ± 0.07 | 2.39 ± 0.07 | 8.83 ± 0.89  | 74.89 ± 11.39 | 61.65 ± 3.78  | 0.49 ± 0.09 | 0.86 ± 0.22 | 1.06 ± 0.15 | 0.13 ± 0.09 |
| HPG 200 mg/kg | 2.01 ± 0.16 | 2.11 ± 0.13 | 2.16 ± 0.21 | 8.05 ± 1.32  | 70.12 ± 2.86  | 72.27 ± 6.08  | 0.66 ± 0.12 | 1.11 ± 0.18 | 0.71 ± 0.40 | 0.20 ± 0.12 |
| CCG 200 mg/kg | 2.06 ± 0.09 | 2.09 ± 0.03 | 2.24 ± 0.11 | 7.78 ± 1.36  | 82.51 ± 3.58  | 59.26 ± 3.88  | 0.54 ± 0.07 | 0.96 ± 0.20 | 1.03 ± 0.51 | 0.21 ± 0.06 |

All values are expressed as mean ± SEM. of eight mice in each group. TG: triglycerides, TC: total cholesterol, HDL-C: high-density lipoprotein, LDL-C: low-density lipoprotein, ALT: alanine aminotransferase, AST: aspartate aminotransferase.

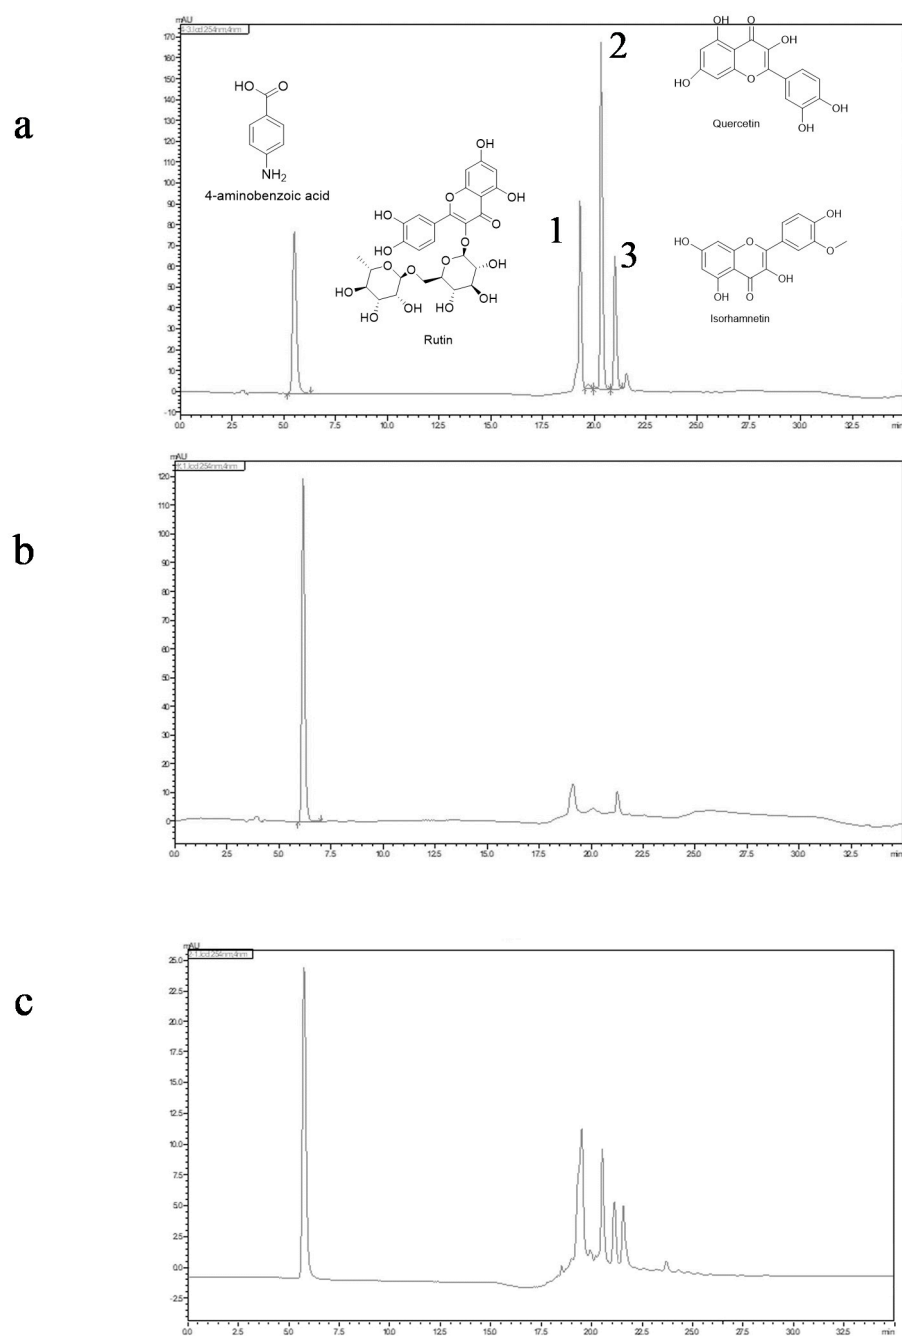

**Figure S1.** HPLC analysis results: (a) internal standard and references; (b) the HPLC diagram of sea buckthorn flavonoids extracted by HRE method (HPG); (c) the HPLC diagram of sea buckthorn flavonoids extracted by MCAE method (MPG).
